# Supplementary material
Source: MDPI journal article supplement (https://www.mdpi.com/2227-9717/12/2/350)
Supplement: s1 [file s1]

Supplementary material

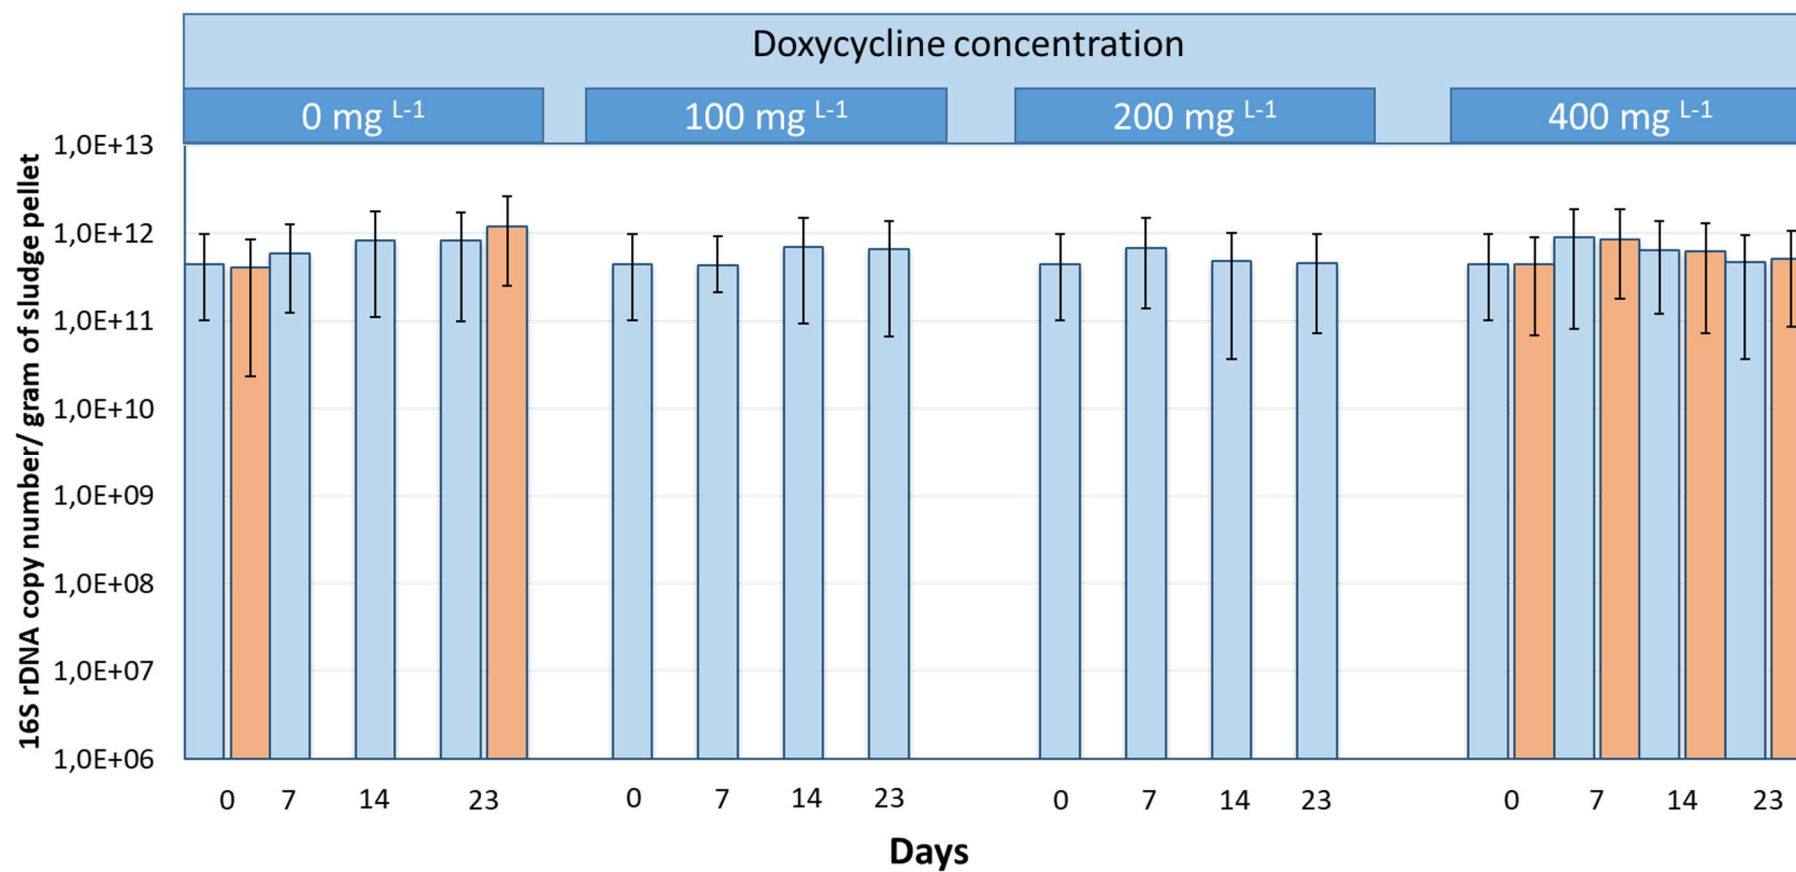

Figure S1: Real time qPCR quantification of the total *Bacteria* according to incubation time and doxycycline concentration. Data are presented as a mean of 6 replicates and minimum and maximum values.

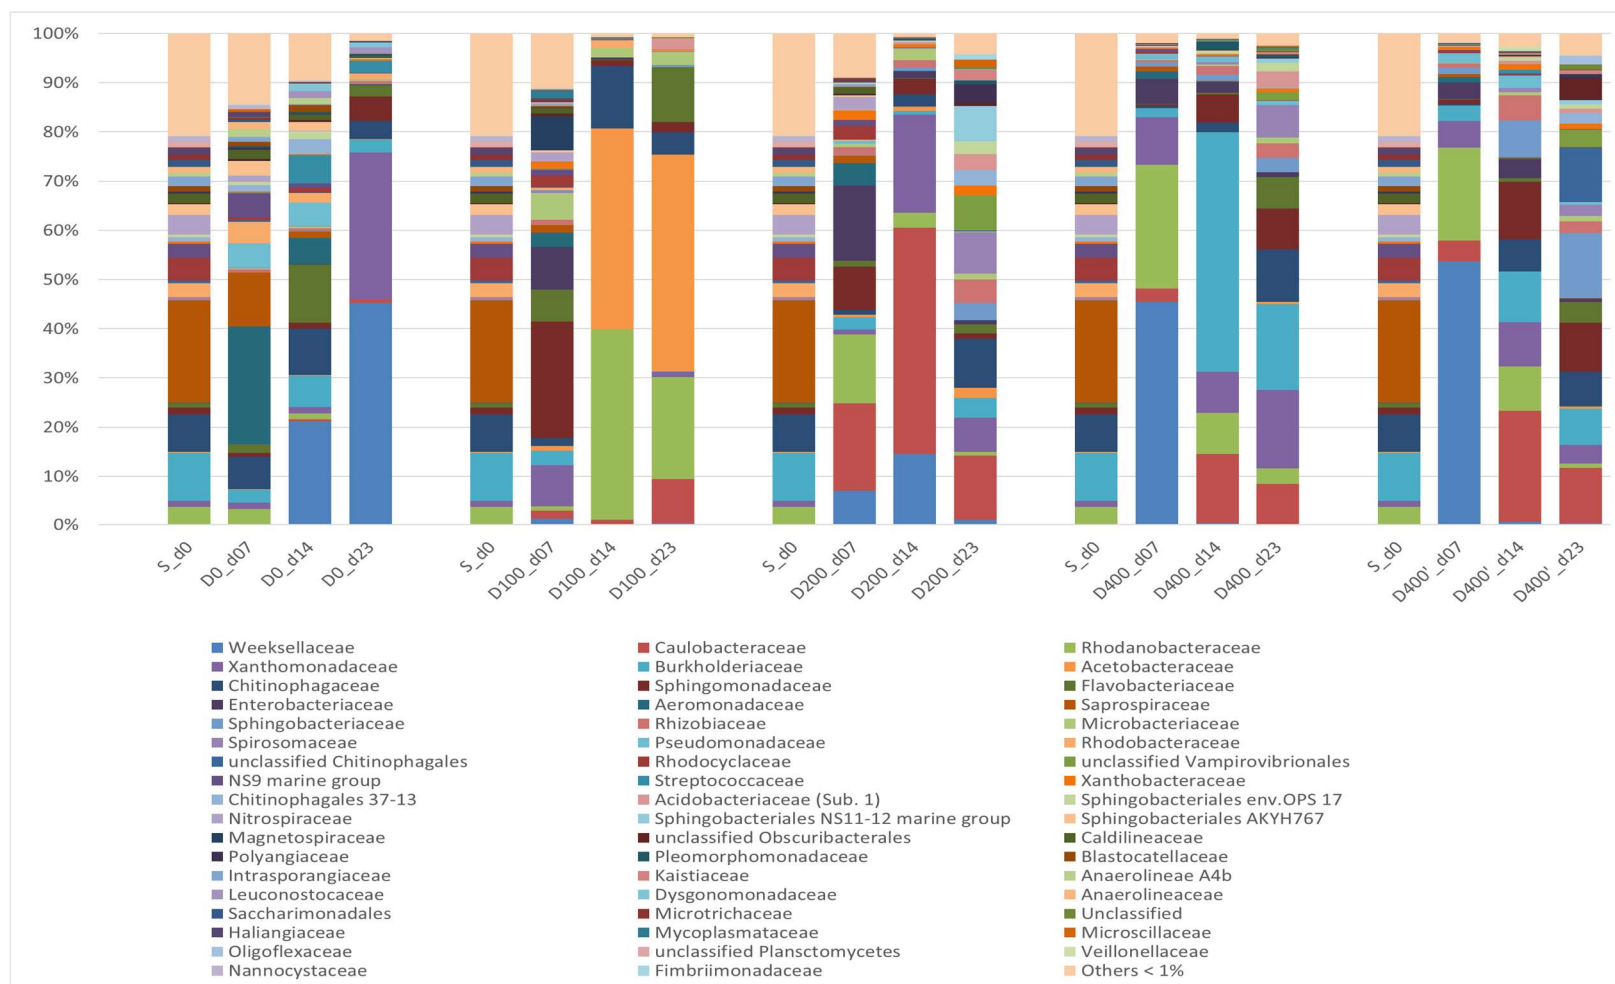

Figure S2: Relative abundance of the different bacterial families according to incubation time and doxycycline concentration. Legend is the same as in Figure 4.

**Table S1. Closest relatives of the microbial populations proposed as representative of sludge variability by PCA of sludge microbial community structures**

|               | Identification                                                                                                                   | Acc. Number  | % similarity |
|---------------|----------------------------------------------------------------------------------------------------------------------------------|--------------|--------------|
| <b>Day 0</b>  |                                                                                                                                  |              |              |
| Cluster_14    | Bacteria; Proteobacteria; Gammaproteobacteria; Aeromonadales; Aeromonadaceae; Tolumonas; Tolumonas auensis                       | CP001616     | 100.0        |
| Cluster_26    | Bacteria; Bacteroidetes; Bacteroidia; Chitinophagales; Saprospiraceae; unknown genus; unknown species                            | EU177709     | 100.0        |
| Cluster_20    | Bacteria; Nitrospirae; Nitrospira; Nitrospirales; Nitrospiraceae; Nitrospira; Nitrospira defluvii                                | FP929003     | 100.0        |
| <b>DC 100</b> |                                                                                                                                  |              |              |
| Cluster_3     | Bacteria; Proteobacteria; Alphaproteobacteria; Acetobacterales; Acetobacteraceae; Nguyenibacter; Gluconacetobacter-like organism | AF127400     | 99.5         |
| Cluster_9     | Bacteria; Proteobacteria; Gammaproteobacteria; Xanthomonadales; Rhodanobacteraceae; Dyella; Dyella sp.                           | FN178370     | 99.2         |
| Cluster_9     | Bacteria; Proteobacteria; Gammaproteobacteria; Xanthomonadales; Rhodanobacteraceae; Frateuria; Frateuria aurantia                | AB680411     | 99.2         |
| Cluster_2     | Bacteria; Proteobacteria; Gammaproteobacteria; Xanthomonadales; Xanthomonadaceae; SN8; unknown species                           | EF515229     | 100.0        |
| <b>DC 400</b> |                                                                                                                                  |              |              |
| Cluster_5     | Bacteria; Proteobacteria; Alphaproteobacteria; Caulobacterales; Caulobacteraceae; Brevundimonas; Brevundimonas sp.               | DQ341416     | 99.7         |
| Cluster_6     | Bacteria; Proteobacteria; Gammaproteobacteria; Xanthomonadales; Rhodanobacteraceae; Luteibacter; Luteibacter anthropi            | FM212561     | 100.0        |
| Cluster_4     | Bacteria; Bacteroidetes; Bacteroidia; Flavobacteriales; Weeksellaceae; Chryseobacterium; Candidatus Chryseobacterium massiliae   | FJ812379     | 100.0        |
| Cluster_10    | Bacteria; Proteobacteria; Gammaproteobacteria; Xanthomonadales; Xanthomonadaceae; Lysobacter; Lysobacter novalis                 | KM658501     | 100.0        |
| Cluster_11    | Bacteria; Proteobacteria; Gammaproteobacteria; Betaproteobacteriales; Burkholderiaceae; Pelomonas; metagenome                    | FPLS01009417 | 100.0        |
| Cluster_11    | Bacteria; Proteobacteria; Gammaproteobacteria; Betaproteobacteriales; Burkholderiaceae; Roseateles; Mitsuraria sp.               | AB560535     | 100.0        |
| Cluster_13    | Bacteria; Proteobacteria; Alphaproteobacteria; Sphingomonadales; Sphingomonadaceae; Novosphingobium; Novosphingobium sp.         | AJ746093     | 100.0        |
| Cluster_25    | Bacteria; Proteobacteria; Gammaproteobacteria; Xanthomonadales; Xanthomonadaceae; Stenotrophomonas; Stenotrophomonas maltophilia | KP790032     | 100.0        |

|            |                                                                                                                        |          |       |
|------------|------------------------------------------------------------------------------------------------------------------------|----------|-------|
| Cluster_17 | Bacteria; Proteobacteria; Alphaproteobacteria; Sphingomonadales; Sphingomonadaceae; Sphingomonas; Sphingomonas leidyi  | JQ723715 | 100.0 |
| Cluster_16 | Bacteria; Proteobacteria; Gammaproteobacteria; Enterobacteriales; Enterobacteriaceae; Citrobacter; Citrobacter braakii | HQ288930 | 100.0 |
| Cluster_16 | Bacteria; Proteobacteria; Gammaproteobacteria; Enterobacteriales; Enterobacteriaceae; Enterobacter; unknown species    | GQ417323 | 100.0 |
